# Supplementary material
Source: publisher figshare collection journal article supplement (https://acs.figshare.com/ndownloader/files/25007548)
Supplement: Supplementary file 1 [file 25007548]

# Supporting Information

## **Highly conductive silver nanoparticles functionalized aramid fiber paper for electric heaters with rapid response and chemical stability**

Yanfen Zhou<sup>†, ‡, \*</sup>, Zhenhua Sun<sup>†</sup>, Liang Jiang<sup>†, \*</sup>, Shaojuan Chen<sup>†, †</sup>, Jianwei Ma<sup>†, ‡, \*</sup>,  
Fenglei Zhou<sup>†, §</sup>

<sup>†</sup>College of Textiles and Clothing, Qingdao University, Qingdao, 266071, P. R. China

<sup>‡</sup>Industrial Research Institute of Nonwovens and Technical Textiles, Qingdao, 266071,  
P. R. China

<sup>†</sup>Eco-Textile Collaborative Innovation Center, Qingdao University, Qingdao, 266071,  
P. R. China

<sup>§</sup>Centre for Medical Image Computing, University College London, London, WC1V  
6LJ, UK

\*Corresponding authors. Email: liang.jiang@qdu.edu.cn (L. Jiang),  
mjwfz@qdu.edu.cn (J. Ma).

# 1. SEM images and EDS results of pristine AFP and plasma-treated AFP

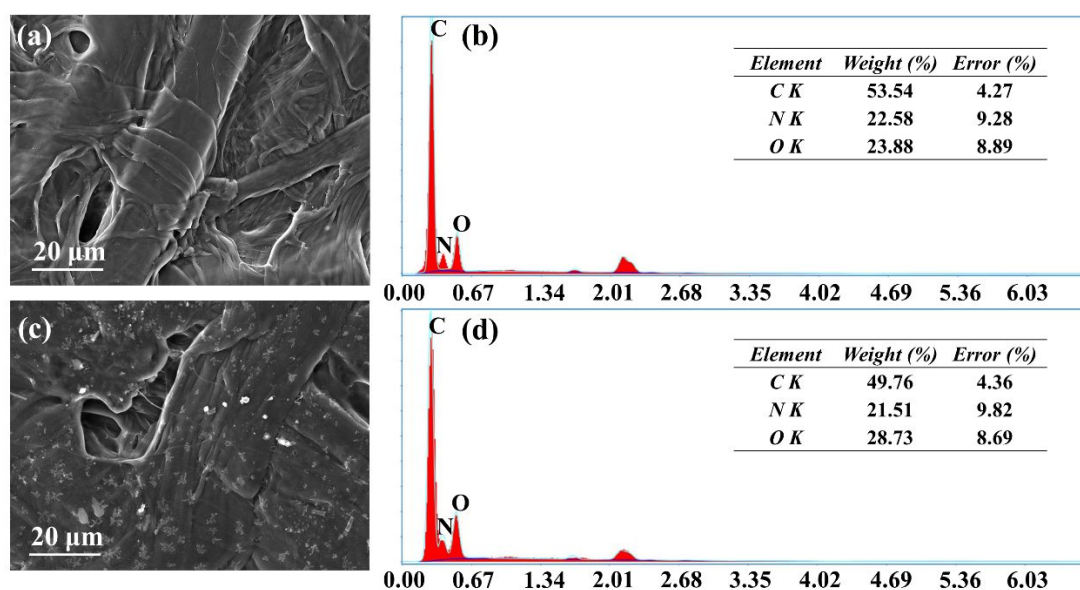

**Figure S1.** SEM images and EDS results of pristine AFP (a, b) and plasma-treated AFP (c, d).

# 2. XPS spectra of N 1s and O 1s peaks for pristine AFP and plasma-treated AFP

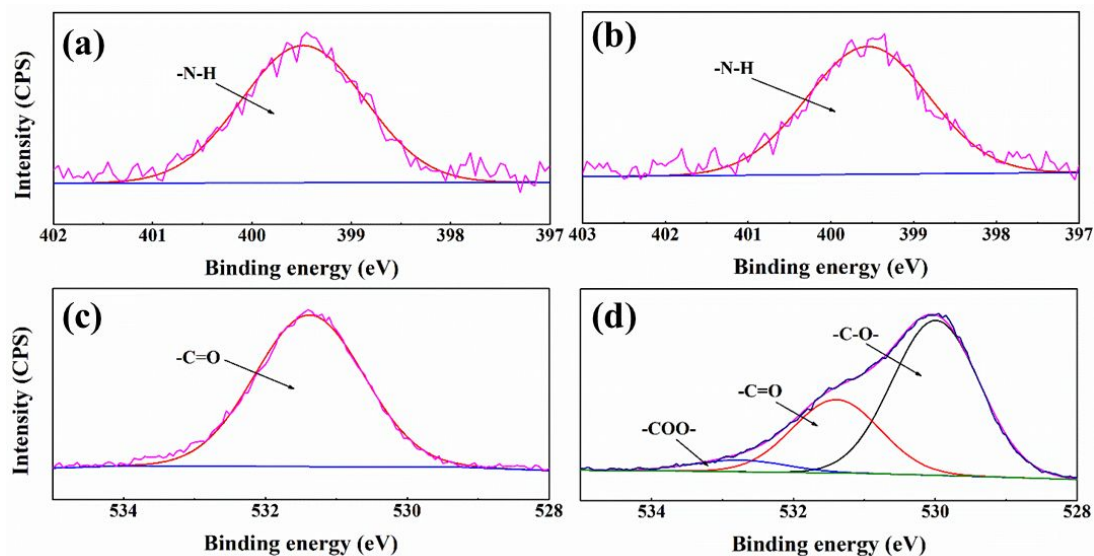

**Figure S2.** The XPS spectra of N 1s peaks for pristine AFP (a) and plasma-treated AFP (b); XPS spectra of O 1s peaks for pristine AFP (c) and plasma-treated AFP (d).

### 3. AgNPs-coated AFP without plasma treatment

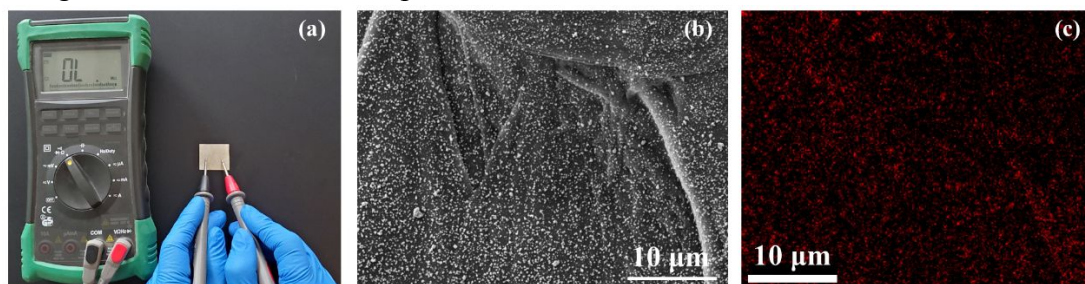

**Figure S3.** The electrical resistance of AgNPs-coated AFP without plasma treatment (a); SEM image (b) and EDS mapping (c) of AgNPs-coated AFP without plasma treatment.

### 4. SEM and EDS Mapping of Silver-coated AFP

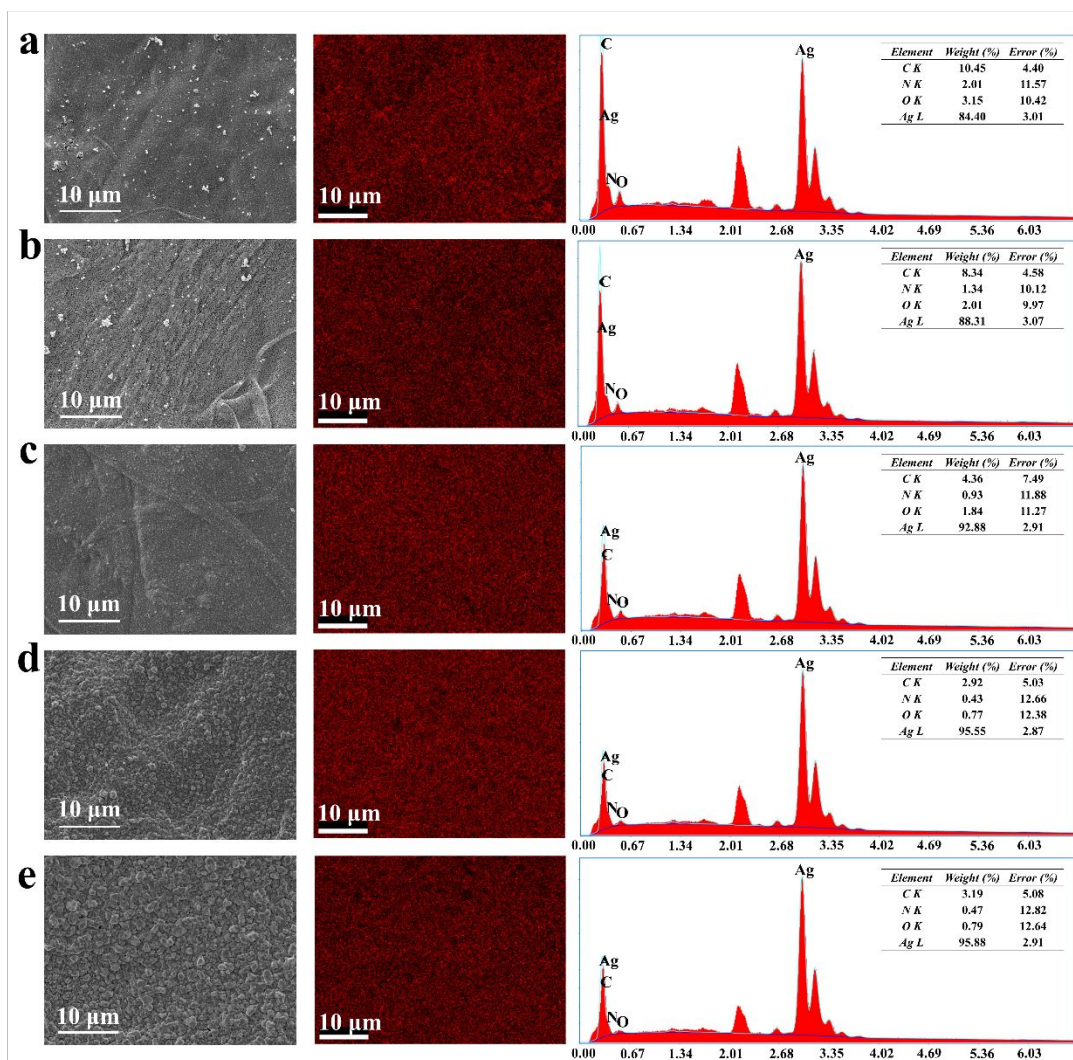

**Figure S4.** SEM images and EDS mapping of AFP/AgNPs prepared at AgNO<sub>3</sub> concentration of 5 (a), 10 (b), 15 (c), 20 (d) and 30 (e) g/L.



## 5. Heating repeatability and long-term stability of electrical heaters after being soaked in acid/alkali solutions and various organic solvents

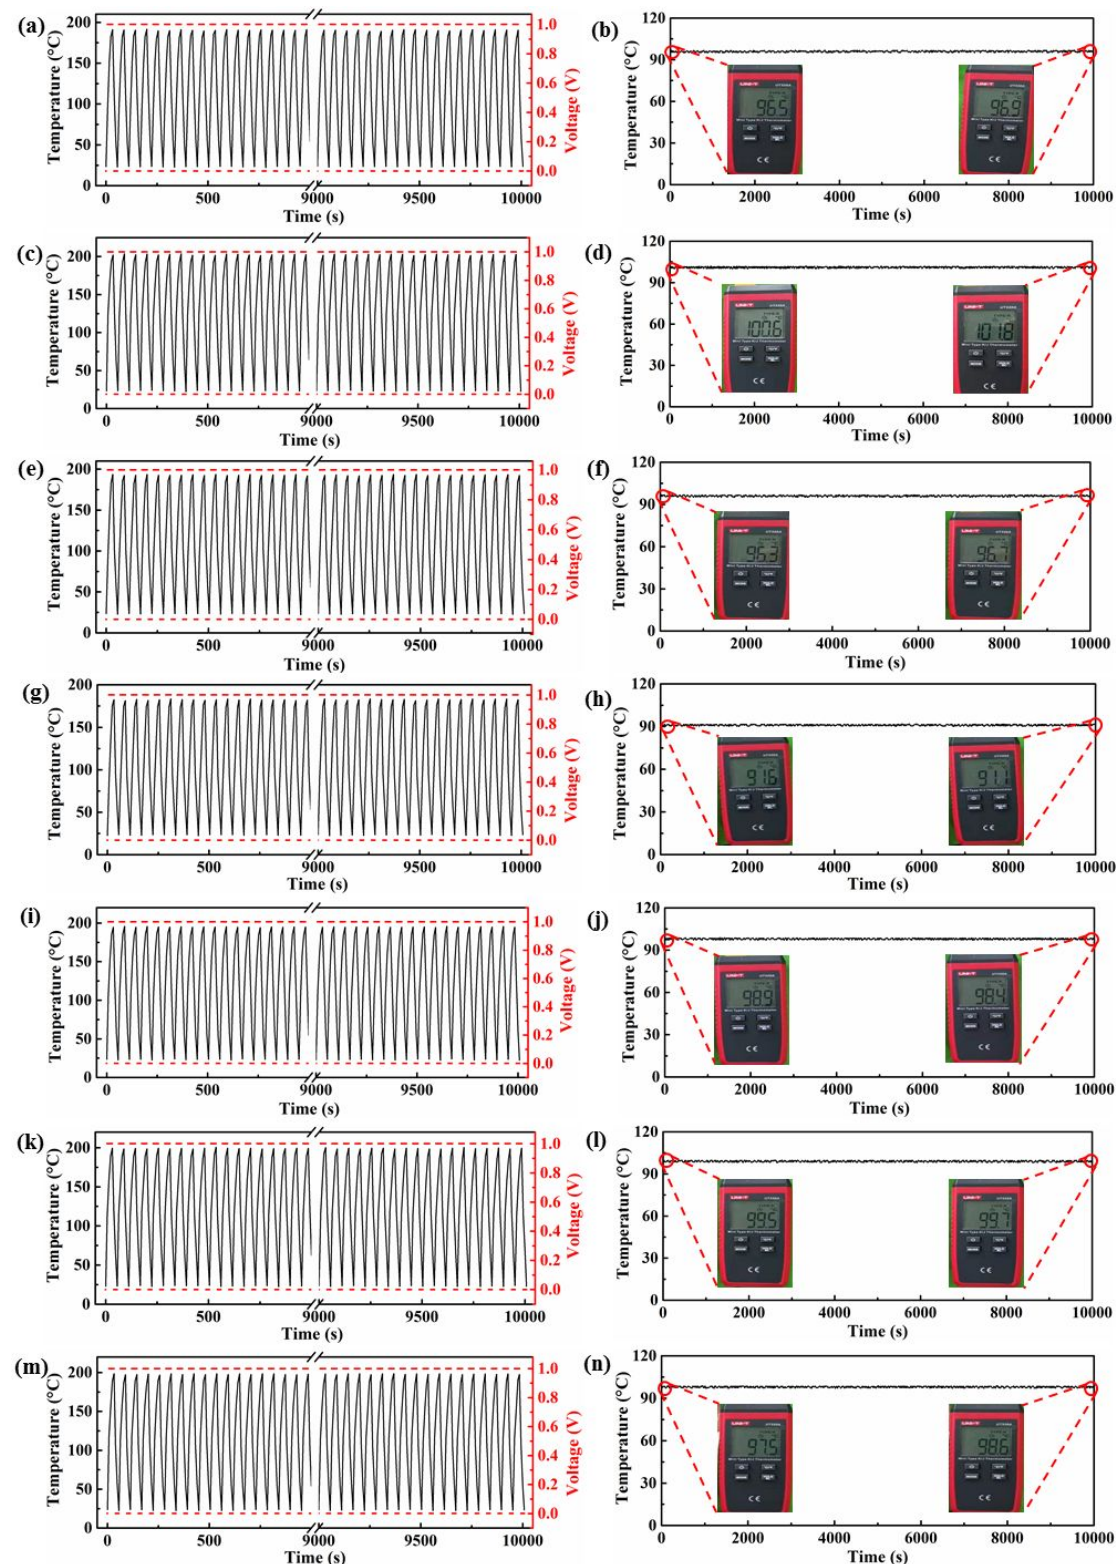

**Figure S5.** The heating repeatability under pulse voltage of 0V/ 1V for AFP/AgNPs-15 electrical heater after being soaked in pH 2.0 (a), pH 7.0 (c), pH 12.0 (e) solution, ethanol (g), acetone (i), N-heptane (k) and xylene (m) for 3 days; the long-term stability under a constant voltage of 0.5 V for AFP/AgNPs-15 electrical heater after being

soaked in pH 2.0 (b), pH 7.0 (d), pH 12.0 (f) solution, ethanol (h), acetone (j), N-heptane (l) and xylene (n) for 3 days.

**6.** SEM image of AFP/AgNPs-15 after being immersed in acid/alkali solutions and various organic solvents

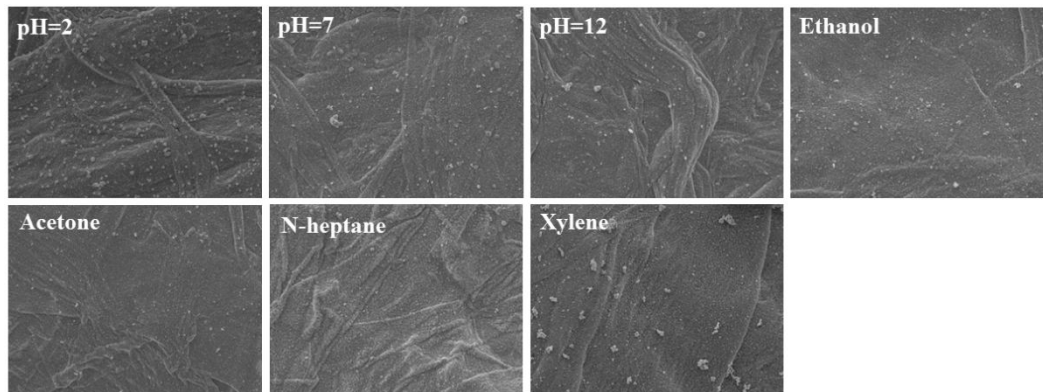

**Figure S6.** SEM image of AFP/AgNPs-15 after being immersed in acid solution (pH = 2), neutral aqueous solution (pH = 7), alkali solution (pH = 12), ethanol, acetone, N-heptane and xylene for 3 days.
